# Supplementary material for: Insights into metabolic heterogeneity of colorectal cancer gained from fluorescence lifetime imaging
Source: eLife. 2024 Aug 28;13:RP94438. doi: 10.7554/eLife.94438 (PMC11357354; doi:10.7554/eLife.94438)
Supplement: Figure 1—source data 5. [file elife-94438-fig1-data5.xlsx]

## Sheet: in vitro
cell line	N (cell number)	a1, %
HT29	1	81.54
HT29	2	81.49
HT29	3	82.12
HT29	4	81.09
HT29	5	81.19
HT29	6	82.14
HT29	7	82.22
HT29	8	80.93
HT29	9	82.39
HT29	10	81.75
HT29	11	81.27
HT29	12	82.29
HT29	13	80.92
HT29	14	80.14
HT29	15	81.78
HT29	16	81.24
HT29	17	81.26
HT29	18	82.03
HT29	19	79.39
HT29	20	80.03
HT29	21	80.55
HT29	22	79.77
HT29	23	80.45
HT29	24	79
HT29	25	79.73
HT29	26	79.89
HT29	27	79.03
HT29	28	79.09
HT29	29	78.71
HT29	30	79.21
HT29	31	78.85
HT29	32	77.85
HT29	33	79.17
HT29	34	79.66
HT29	35	79.26
HT29	36	79.74
HT29	37	79.84
HT29	38	78.23
HT29	39	80.36
HT29	40	79.75
HT29	41	81.02
HT29	42	81.53
HT29	43	80.24
HT29	44	81.49
HT29	45	81.59
HT29	46	81.91
HT29	47	81.31
HT29	48	80.22
HT29	49	80.37
HT29	50	80.5
HT29	51	80.58
HT29	52	80.62
HT29	53	80.66
HT29	54	80.46
HT29	55	79.75
HT29	56	81.34
HT29	57	81.39
HT29	58	80.52
HT29	59	81.25
HT29	60	80.65
HT29	61	81.61
HT29	62	81.81
HT29	63	82.34
HT29	64	81.14
HT29	65	80.65
HT29	66	79.56
HT29	67	79.81
HT29	68	78.67
HT29	69	80.53
HT29	70	80.27
HT29	71	79.21
HT29	72	78.82
HT29	73	77.24
HT29	74	79.08
HT29	75	80.86
HT29	76	79.23
HT29	77	80.6
HT29	78	79.43
HT29	79	80.77
HT29	80	78.52
HT29	81	80.73
HT29	82	81.29
HT29	83	81.48
HT29	84	80.94
HT29	85	78.86
HT29	86	78.34
HT29	87	79.92
HT29	88	78.79
HT29	89	80.36
HT29	90	80.41
HT29	91	78.81
HT29	92	70.2
HT29	93	81.4
HT29	94	81.95
HT29	95	78.26
HT29	96	79.59
HT29	97	80.83
HT29	98	79
HT29	99	81.71
HT29	100	81.28
HT29	101	81.45
HT29	102	79.5
HT29	103	79.04
HT29	104	80.83
HT29	105	80.68
HT29	106	80.77
HT29	107	77.33
HT29	108	79.62
HT29	109	81.27
HT29	110	81.84
HT29	111	80.99
HT29	112	82.05
HT29	113	80.73
HT29	114	78.32
HT29	115	81.16
HT29	116	80.78
HT29	117	79.66
HT29	118	79.56
HT29	119	79.11
HT29	120	81.08
HT29	121	79.82
HT29	122	79.41
HT29	123	78.26
HT29	124	77.94
HT29	125	79.55
HT29	126	81.17
HT29	127	82.04
HT29	128	80.87
HT29	129	79.12
HT29	130	77.87
HT29	131	78.33
HT29	132	79.76
HT29	133	79.72
HT29	134	79.79
HT29	135	78.53
HT29	136	79.07
HT29	137	82.24
HT29	138	79.75
HT29	139	80.4
HT29	140	80.65
HT29	141	80.72
HT29	142	80.62
HT29	143	77.96
HT29	144	78.77
HT29	145	79.52
HT29	146	80.6
HT29	147	79.3
HT29	148	78.21
HT29	149	82.05
HT29	150	79.97
HT29	151	80.43
HT29	152	80.24
HT29	153	79.89
HT29	154	80.19
HT29	155	80.15
HT29	156	79.94
HT29	157	79.49
HT29	158	80.11
HT29	159	79.34
HT29	160	77.24
HT29	161	78.65
HT29	162	78.89
HT29	163	79.58
HT29	164	80.39
HT29	165	79.74
HT29	166	79.28
HT29	167	81.03
HT29	168	78.83
HT29	169	79.13
HT29	170	79.19
HT29	171	80.71
HT29	172	78.89
HT29	173	77.14
HT29	174	80.07
HT29	175	80.41
HT29	176	79.76
HT29	177	81.19
HT29	178	80.78
HT29	179	82.47
HT29	180	81.16
HT29	181	80.7
HT29	182	79.55
HT29	183	78.76
HT29	184	78.54
HT29	185	77.82
HT29	186	82.19
HT29	187	77.68
HT29	188	78.62
HT29	189	79.09
HT29	190	78.53
HT29	191	80.58
HT29	192	78.79
HT29	193	80.75
HT29	194	79.62
HT29	195	81.22
HT29	196	80.47
HT29	197	80.08
HT29	198	80.61
HT29	199	77.76
HT29	200	79.5
HT29	201	82.71
HT29	202	80.92
HT29	203	80.86
HT29	204	81.66
HT29	205	83.02
HT29	206	78.21
HT29	207	80.03
HT29	208	77.9
HT29	209	78.59
HT29	210	79.92
HT29	211	78.53
HT29	212	79.5
HT29	213	80.12
HT29	214	80.69
HT29	215	79.96
HT29	216	79.42
HT29	217	79.16
HT29	218	80.86
HT29	219	80.17
HT29	220	81.64
HT29	221	78.82
HT29	222	80.72
HT29	223	81.07
HT29	224	80.25
HT29	225	82.13
HT29	226	79.38
HT29	227	80.9
HT29	228	79.77
HT29	229	79.67
HT29	230	78.74
HT29	231	79.73
HT29	232	79.47
HT29	233	78.9
HT29	234	80.62
HT29	235	79.9
HT29	236	78.51
HT29	237	79.77
HT29	238	78.66
HT29	239	78.98
HT29	240	78.95
HT29	241	78.2
HT29	242	79.61
HT29	243	80.59
HT29	244	79.58
HT29	245	80.78
HT29	246	82.21
HT29	247	82.55
HT29	248	81.5
HT29	249	82.1
HT29	250	81.59
HT29	251	81.41
HT29	252	80.04
HT29	253	80.47
HT29	254	81.36
HT29	255	80.94
HT29	256	81.37
HT29	257	81.89
HT29	258	81.39
HT29	259	79.96
HT29	260	79.85
HT29	261	81.13
HT29	262	80.53
HT29	263	79.93
HT29	264	79.04
HT29	265	79.91
HT29	266	81.11
HT29	267	80.19
HT29	268	79.93
HT29	269	80.69
HT29	270	79.17
HT29	271	79.34
HT29	272	79.05
HT29	273	78.03
HT29	274	81.85
HT29	275	80.45
HT29	276	81.02
HT29	277	81.48
HT29	278	82.51
HT29	279	81.45
HT29	280	79.15
HCT116	1	81.31
HCT116	2	81.88
HCT116	3	83.21
HCT116	4	82.38
HCT116	5	81.75
HCT116	6	82.4
HCT116	7	81.75
HCT116	8	83.04
HCT116	9	80.33
HCT116	10	80.87
HCT116	11	82.06
HCT116	12	82.65
HCT116	13	83.28
HCT116	14	83.93
HCT116	15	79.61
HCT116	16	80.68
HCT116	17	80.54
HCT116	18	80.89
HCT116	19	82.81
HCT116	20	81.84
HCT116	21	80.38
HCT116	22	80.23
HCT116	23	80.6
HCT116	24	82.89
HCT116	25	80.52
HCT116	26	85.05
HCT116	27	83.88
HCT116	28	84.46
HCT116	29	83.55
HCT116	30	83.01
HCT116	31	84.33
HCT116	32	85.22
HCT116	33	82.07
HCT116	34	84.42
HCT116	35	84.37
HCT116	36	86.14
HCT116	37	84.17
HCT116	38	83.51
HCT116	39	84.33
HCT116	40	85.24
HCT116	41	81.47
HCT116	42	82.71
HCT116	43	83.47
HCT116	44	84.51
HCT116	45	84.43
HCT116	46	82.2
HCT116	47	83.25
HCT116	48	85.46
HCT116	49	84.09
HCT116	50	83.02
HCT116	51	85.02
HCT116	52	84.21
HCT116	53	84.95
HCT116	54	84.76
HCT116	55	84.65
HCT116	56	86.12
HCT116	57	85.53
HCT116	58	84.03
HCT116	59	85.4
HCT116	60	84.06
HCT116	61	83.85
HCT116	62	83.33
HCT116	63	83.2
HCT116	64	85.44
HCT116	65	84.16
HCT116	66	84.15
HCT116	67	83.47
HCT116	68	85.05
HCT116	69	86.43
HCT116	70	84.75
HCT116	71	85.16
HCT116	72	83.52
HCT116	73	85.59
HCT116	74	83.67
HCT116	75	82.68
HCT116	76	83.53
HCT116	77	82.69
HCT116	78	83.88
HCT116	79	85.93
HCT116	80	84.48
HCT116	81	85.19
HCT116	82	83.61
HCT116	83	85.23
HCT116	84	84.67
HCT116	85	84.98
HCT116	86	85.41
HCT116	87	84.35
HCT116	88	85.15
HCT116	89	85.17
HCT116	90	82.48
HCT116	91	84.47
HCT116	92	82.05
HCT116	93	82.84
HCT116	94	84.27
HCT116	95	84.81
HCT116	96	83.39
HCT116	97	82.5
HCT116	98	81.84
HCT116	99	83.72
HCT116	100	83.91
HCT116	101	83.92
HCT116	102	85.51
HCT116	103	83.19
HCT116	104	83.22
HCT116	105	83.81
HCT116	106	81.64
HCT116	107	82.39
HCT116	108	82.7
HCT116	109	82.24
HCT116	110	85.65
HCT116	111	84.55
HCT116	112	84.85
HCT116	113	84.32
HCT116	114	85.44
HCT116	115	84.5
HCT116	116	83.42
HCT116	117	82.77
HCT116	118	84.26
HCT116	119	84.8
HCT116	120	82.61
HCT116	121	82.92
HCT116	122	82.37
HCT116	123	84.54
HCT116	124	85.11
HCT116	125	83.55
HCT116	126	84.52
HCT116	127	84.82
HCT116	128	84.9
HCT116	129	84.76
HCT116	130	84.81
HCT116	131	84.17
HCT116	132	85.49
HCT116	133	84.65
HCT116	134	82.74
HCT116	135	84.78
HCT116	136	84.75
HCT116	137	84.47
HCT116	138	82.74
HCT116	139	83.76
HCT116	140	84.32
HCT116	141	86.57
HCT116	142	87.07
HCT116	143	84.44
HCT116	144	86.75
HCT116	145	85
HCT116	146	85.32
HCT116	147	86.71
HCT116	148	86.97
HCT116	149	86.48
HCT116	150	85.44
HCT116	151	85.65
HCT116	152	84.14
HCT116	153	85.37
HCT116	154	84.15
HCT116	155	86.61
HCT116	156	87.24
HCT116	157	85.55
HCT116	158	82.53
HCT116	159	85.09
HCT116	160	84.59
HCT116	161	86.38
HCT116	162	86.07
HCT116	163	86.8
HCT116	164	86.19
HCT116	165	84.09
HCT116	166	84.99
HCT116	167	86.7
HCT116	168	86.42
HCT116	169	85.25
HCT116	170	84.06
HCT116	171	86.61
HCT116	172	86.42
HCT116	173	83.78
HCT116	174	85.04
HCT116	175	83.36
HCT116	176	85.2
HCT116	177	85.25
HCT116	178	85.56
HCT116	179	85.93
HCT116	180	85.54
HCT116	181	85.75
HCT116	182	85.01
HCT116	183	86.93
HCT116	184	84.6
HCT116	185	85.91
CaCo2	1	71.325
CaCo2	2	70.7473
CaCo2	3	71.6898
CaCo2	4	64.6869
CaCo2	5	74.7707
CaCo2	6	73.5343
CaCo2	7	68.8826
CaCo2	8	69.5008
CaCo2	9	66.0956
CaCo2	10	69.1461
CaCo2	11	70.5548
CaCo2	12	74.2539
CaCo2	13	68.3049
CaCo2	14	70.271
CaCo2	15	69.521
CaCo2	16	69.1967
CaCo2	17	70.5041
CaCo2	18	73.6762
CaCo2	19	72.8452
CaCo2	20	72.3486
CaCo2	21	69.2981
CaCo2	22	71.8621
CaCo2	23	70.5345
CaCo2	24	72.004
CaCo2	25	75.3687
CaCo2	26	72.5411
CaCo2	27	71.8114
CaCo2	28	71.781
CaCo2	29	72.5614
CaCo2	30	73.2505
CaCo2	31	71.3452
CaCo2	32	71.7405
CaCo2	33	71.102
CaCo2	34	73.5951
CaCo2	35	70.95
CaCo2	36	73.0985
CaCo2	37	73.4026
CaCo2	38	72.9465
CaCo2	39	71.629
CaCo2	40	72.2878
CaCo2	41	72.4195
CaCo2	42	74.041
CaCo2	43	70.1494
CaCo2	44	70.6561
CaCo2	45	72.1661
CaCo2	46	71.5175
CaCo2	47	71.9128
CaCo2	48	73.4026
CaCo2	49	73.8687
CaCo2	50	72.6425
CaCo2	51	71.9026
CaCo2	52	73.0783
CaCo2	53	71.8824
CaCo2	54	71.8317
CaCo2	55	71.4365
CaCo2	56	73.4836
CaCo2	57	72.0952
CaCo2	58	70.8385
CaCo2	59	71.5074
CaCo2	60	73.1188
CaCo2	61	72.3688
CaCo2	62	72.0547
CaCo2	63	71.7101
CaCo2	64	72.7134
CaCo2	65	71.3655
CaCo2	66	73.3113
CaCo2	67	72.9566
CaCo2	68	74.9937
CaCo2	69	74.8214
CaCo2	70	76.1693
CaCo2	71	71.254
CaCo2	72	71.3554
CaCo2	73	72.9972
CaCo2	74	73.4431
CaCo2	75	73.5039
CaCo2	76	73.3417
CaCo2	77	71.4061
CaCo2	78	72.6019
CaCo2	79	73.7978
CaCo2	80	75.0646
CaCo2	81	75.5511
CaCo2	82	75.2268
CaCo2	83	74.9025
CaCo2	84	74.9025
CaCo2	85	76.453
CaCo2	86	75.1558
CaCo2	87	76.5544
CaCo2	88	75.2673
CaCo2	89	74.6491
CaCo2	90	76.0882
CaCo2	91	75.47
CaCo2	92	75.8146
CaCo2	93	76.6253
CaCo2	94	76.0882
CaCo2	95	76.4328
CaCo2	96	75.5815
CaCo2	97	75.9159
CaCo2	98	76.1896
CaCo2	99	76.2605
CaCo2	100	74.8113
CaCo2	101	76.9395
CaCo2	102	75.0545
CaCo2	103	73.7775
CaCo2	104	75.3788
CaCo2	105	74.568
CaCo2	106	75.622
CaCo2	107	74.8923
CaCo2	108	75.693
CaCo2	109	76.676
CaCo2	110	75.318
CaCo2	111	75.3383
CaCo2	112	75.774
CaCo2	113	76.4328
CaCo2	114	77.1118
CaCo2	115	75.0545
CaCo2	116	76.5848
CaCo2	117	72.3486
CaCo2	118	75.1964
CaCo2	119	74.4261
CaCo2	120	76.2301
CaCo2	121	76.7064
CaCo2	122	75.9159
CaCo2	123	75.8855
CaCo2	124	74.6288
CaCo2	125	76.1794
CaCo2	126	75.8652
CaCo2	127	75.2572
CaCo2	128	75.1457
CaCo2	129	73.7269
CaCo2	130	72.6323
CaCo2	131	74.2235
CaCo2	132	72.4296
CaCo2	133	74.5072
CaCo2	134	73.8485
CaCo2	135	75.7132
CaCo2	136	74.2336
CaCo2	137	74.9937
CaCo2	138	76.2301
CaCo2	139	75.3078
CaCo2	140	75.5004
CaCo2	141	73.1593
CaCo2	142	75.6017
CaCo2	143	74.4565
CaCo2	144	74.6592
CaCo2	145	74.8518
CaCo2	146	73.5951
СТ26	1	86.03
СТ26	2	86.22
СТ26	3	88.4
СТ26	4	84.91
СТ26	5	89.05
СТ26	6	85.98
СТ26	7	84.49
СТ26	8	86.22
СТ26	9	85.02
СТ26	10	86.19
СТ26	11	84.83
СТ26	12	83.58
СТ26	13	88.04
СТ26	14	86.29
СТ26	15	86.31
СТ26	16	87.87
СТ26	17	85.39
СТ26	18	86.11
СТ26	19	85.88
СТ26	20	84.83
СТ26	21	85.05
СТ26	22	86.39
СТ26	23	85.7
СТ26	24	85.02
СТ26	25	86.15
СТ26	26	84.94
СТ26	27	86.31
СТ26	28	85.6
СТ26	29	84.21
СТ26	30	84.12
СТ26	31	86.53
СТ26	32	84.63
СТ26	33	86.74
СТ26	34	85.4
СТ26	35	86.82
СТ26	36	86.14
СТ26	37	87.91
СТ26	38	85.49
СТ26	39	85.29
СТ26	40	85.27
СТ26	41	84.79
СТ26	42	87.09
СТ26	43	86
СТ26	44	84.98
СТ26	45	87.05
СТ26	46	86.67
СТ26	47	88.01
СТ26	48	86.77
СТ26	49	87.21
СТ26	50	86.64
СТ26	51	86.46
СТ26	52	85.22
СТ26	53	86.02
СТ26	54	84.67
СТ26	55	86.4
СТ26	56	85.51
СТ26	57	86.02
СТ26	58	85.53
СТ26	59	85.75
СТ26	60	87.86
СТ26	61	87.31
СТ26	62	86.81
СТ26	63	87.09
СТ26	64	87.46
СТ26	65	87.15
СТ26	66	87.91
СТ26	67	85.96
СТ26	68	86.71
СТ26	69	87.23
СТ26	70	87.83
СТ26	71	86.2
СТ26	72	85.73
СТ26	73	86.93
СТ26	74	87.6
СТ26	75	87.18
СТ26	76	85.74
СТ26	77	86.48
СТ26	78	85.64
СТ26	79	86.68
СТ26	80	85.24
СТ26	81	86.99
СТ26	82	85.41
СТ26	83	86.26
СТ26	84	86.72
СТ26	85	87.16
СТ26	86	85.7
СТ26	87	86
СТ26	88	87.19
СТ26	89	86.6
СТ26	90	88.19
СТ26	91	88.44
СТ26	92	87.43
СТ26	93	86.22
СТ26	94	87.54
СТ26	95	87.28
СТ26	96	85.59
СТ26	97	89.4
СТ26	98	89.21
СТ26	99	85.69
СТ26	100	86.94
СТ26	101	88.79
СТ26	102	85.64
СТ26	103	87.17
СТ26	104	84.52
СТ26	105	87.29
СТ26	106	85.83
СТ26	107	87.96
СТ26	108	85.03
СТ26	109	86.75
СТ26	110	86.9
СТ26	111	87.34
СТ26	112	84.33
СТ26	113	87.2
СТ26	114	88.95
СТ26	115	88.06
СТ26	116	87.54
СТ26	117	87
СТ26	118	87.22
СТ26	119	87.06
СТ26	120	86.89
СТ26	121	83.91
СТ26	122	86.52
СТ26	123	85.32
СТ26	124	90.3
СТ26	125	88.03
СТ26	126	85.94
СТ26	127	87.87
СТ26	128	87.56
СТ26	129	83.73
СТ26	130	84.65
СТ26	131	88.33
СТ26	132	86.34
СТ26	133	85.48
СТ26	134	85.5
СТ26	135	89.76
СТ26	136	88.29
СТ26	137	85
СТ26	138	87.2
