# Supplementary material for: Insights into metabolic heterogeneity of colorectal cancer gained from fluorescence lifetime imaging
Source: eLife. 2024 Aug 28;13:RP94438. doi: 10.7554/eLife.94438 (PMC11357354; doi:10.7554/eLife.94438)
Supplement: Figure 2—source data 5. [file elife-94438-fig2-data5.xlsx]

## Sheet: Лист1
cell line	tumor number	N (cell number)	a1, %
HT29	1	1	81.0937
HT29	1	2	79.5303
HT29	1	3	81.0937
HT29	1	4	77.2903
HT29	1	5	75.8274
HT29	1	6	78.4971
HT29	1	7	79.5577
HT29	1	8	81.112
HT29	1	9	79.4206
HT29	1	10	76.8149
HT29	1	11	77.0617
HT29	1	12	78.3966
HT29	1	13	79.7314
HT29	1	14	77.9851
HT29	1	15	80.3714
HT29	1	16	76.4309
HT29	1	17	80.6183
HT29	1	18	82.52
HT29	1	19	82.3097
HT29	1	20	77.7291
HT29	1	21	79.4663
HT29	1	22	82.0171
HT29	1	23	82.0171
HT29	1	24	79.9874
HT29	1	25	81.1394
HT29	1	26	82.2731
HT29	1	27	80.28
HT29	1	28	82.3737
HT29	1	29	81.6606
HT29	1	30	79.8777
HT29	1	31	80.3166
HT29	1	32	79.768
HT29	1	33	80.6914
HT29	1	34	82.0903
HT29	1	35	81.7337
HT29	1	36	82.5383
HT29	1	37	81.7886
HT29	1	38	81.4137
HT29	1	39	79.7497
HT29	1	40	84.0834
HT29	1	41	84.8971
HT29	1	42	84.4949
HT29	1	43	83.6903
HT29	1	44	85.272
HT29	1	45	85.1531
HT29	1	46	82.3006
HT29	1	47	79.8411
HT29	1	48	83.0046
HT29	1	49	81.6697
HT29	1	50	85.3543
HT29	1	51	83.9006
HT29	1	52	82.5383
HT29	1	53	83.1143
HT29	1	54	83.9829
HT29	1	55	82.1269
HT29	1	56	81.24
HT29	1	57	82.1817
HT29	1	58	81.8891
HT29	1	59	83.1326
HT29	1	60	84.0651
HT29	1	61	80.7463
HT29	1	62	78.872
HT29	1	63	76.2297
HT29	1	64	76.8971
HT29	1	65	81.3589
HT29	1	66	80.7006
HT29	1	67	82.584
HT29	1	68	79.3474
HT29	1	69	81.7886
HT29	1	70	78.7806
HT29	1	71	83.3063
HT29	1	72	80.0606
HT29	1	73	82.5931
HT29	1	74	79.3749
HT29	1	75	82.3554
HT29	1	76	82.904
HT29	1	77	79.768
HT29	1	78	81.0663
HT29	1	79	81.2217
HT29	1	80	81.5326
HT29	1	81	83.9829
HT29	1	82	82.5931
HT29	1	83	80.6183
HT29	1	84	84.2114
HT29	1	85	84.1291
HT29	1	86	83.0869
HT29	1	87	81.7611
HT29	1	88	79.512
HT29	1	89	81.9897
HT29	1	90	81.3589
HT29	1	91	82.136
HT29	1	92	80.9566
HT29	1	93	83.8366
HT29	1	94	81.56
HT29	1	95	83.4434
HT29	1	96	82.2091
HT29	1	97	82.5383
HT29	1	98	83.1417
HT29	1	99	82.8309
HT29	1	100	80.6549
HT29	1	101	79.4206
HT29	1	102	82.5383
HT29	1	103	81.5509
HT29	1	104	81.5051
HT29	1	105	82.0811
HT29	1	106	79.3109
HT29	1	107	78.9634
HT29	1	108	79.4206
HT29	1	109	79.0914
HT29	1	110	78.1771
HT29	1	111	79.9326
HT29	1	112	80.5543
HT29	2	113	84.2297
HT29	2	114	84.1657
HT29	2	115	81.4503
HT29	2	116	82.5017
HT29	2	117	85.656
HT29	2	118	86.3143
HT29	2	119	84.2297
HT29	2	120	82.8857
HT29	2	121	83.0411
HT29	2	122	82.8949
HT29	2	123	82.6389
HT29	2	124	81.4137
HT29	2	125	83.1051
HT29	2	126	81.496
HT29	2	127	81.7246
HT29	2	128	79.1371
HT29	2	129	80.4537
HT29	2	130	81.4046
HT29	2	131	83.8914
HT29	2	132	84.5771
HT29	2	133	83.2331
HT29	2	134	82.264
HT29	2	135	84.6411
HT29	2	136	82.8491
HT29	2	137	84.4126
HT29	2	138	83.6263
HT29	2	139	85.3817
HT29	2	140	84.5406
HT29	2	141	84.0377
HT29	2	142	83.8549
HT29	2	143	83.6446
HT29	2	144	83.992
HT29	2	145	82.8309
HT29	2	146	83.3886
HT29	2	147	83.3977
HT29	2	148	85.0526
HT29	2	149	85.4091
HT29	2	150	83.0137
HT29	2	151	82.2549
HT29	2	152	83.1417
HT29	2	153	82.9131
HT29	2	154	83.6811
HT29	2	155	83.6446
HT29	2	156	81.2583
HT29	2	157	81.1851
HT29	2	158	79.7497
HT29	2	159	80.344
HT29	2	160	79.0274
HT29	2	161	79.192
HT29	2	162	76.12
HT29	2	163	78.2594
HT29	2	164	80.5451
HT29	2	165	79.256
HT29	2	166	79.3566
HT29	2	167	80.2343
HT29	2	168	79.3017
HT29	2	169	77.8023
HT29	2	170	78.7806
HT29	2	171	79.0731
HT29	2	172	80.3806
HT29	2	173	81.5966
HT29	2	174	81.8891
HT29	2	175	81.3406
HT29	2	176	80.344
HT29	2	177	81.3131
HT29	2	178	81.4686
HT29	2	179	79.6857
HT29	2	180	79.2651
HT29	2	181	80.9017
HT29	2	182	80.7646
HT29	2	183	80.8469
HT29	2	184	77.7017
HT29	2	185	81.9257
HT29	2	186	78.552
HT29	2	187	79.768
HT29	2	188	80.9017
HT29	2	189	80.3166
HT29	2	190	80.28
HT29	2	191	80.088
HT29	2	192	79.6766
HT29	2	193	80.2434
HT29	2	194	81.0846
HT29	2	195	79.0731
HT29	2	196	79.3474
HT29	2	197	79.4023
HT29	2	198	80.792
HT29	2	199	79.128
HT29	2	200	77.528
HT29	2	201	80.2069
HT29	2	202	79.7589
HT29	3	203	82.9954
HT29	3	204	81.3131
HT29	3	205	82.4834
HT29	3	206	87.32
HT29	3	207	83.288
HT29	3	208	84.0194
HT29	3	209	83.3337
HT29	3	210	80.3074
HT29	3	211	81.9897
HT29	3	212	84.6503
HT29	3	213	83.1783
HT29	3	214	85.8114
HT29	3	215	82.9131
HT29	3	216	83.4617
HT29	3	217	82.0171
HT29	3	218	83.8366
HT29	3	219	82.5109
HT29	3	220	82.0537
HT29	3	221	82.7577
HT29	3	222	83.2331
HT29	3	223	82.5657
HT29	3	224	81.5051
HT29	3	225	81.2766
HT29	3	226	81.7886
HT29	3	227	84.1017
HT29	3	228	82.2091
HT29	3	229	83.8183
HT29	3	230	82.5749
HT29	3	231	82.9223
HT29	3	232	81.9623
HT29	3	233	82.1086
HT29	3	234	83.3154
HT29	3	235	79.9234
HT29	3	236	83.9554
HT29	3	237	83.6994
HT29	3	238	84.6686
HT29	3	239	83.992
HT29	3	240	83.7634
HT29	3	241	84.312
HT29	3	242	86.616
HT29	3	243	84.2206
HT29	3	244	83.9646
HT29	3	245	83.3337
HT29	3	246	82.4011
HT29	3	247	84.3303
HT29	3	248	83.3794
HT29	3	249	83.3703
HT29	3	250	83.9371
HT29	3	251	83.9737
HT29	3	252	83.1417
HT29	3	253	80.8011
HT29	3	254	81.1211
HT29	3	255	80.3714
HT29	3	256	82.0903
HT29	3	257	79.576
HT29	3	258	80.9657
HT29	3	259	79.9326
HT29	3	260	79.8411
HT29	3	261	78.9909
HT29	3	262	79.896
HT29	3	263	79.6583
HT29	3	264	79.1371
HT29	3	265	80.7097
HT29	3	266	80.0514
HT29	3	267	78.7806
HT29	3	268	79.9326
HT29	3	269	78.9177
HT29	3	270	79.2103
HT29	3	271	79.1829
HT29	3	272	80.6274
HT29	3	273	80.0789
HT29	3	274	79.2651
HT29	3	275	80.0606
HT29	3	276	81.1577
HT29	3	277	80.3166
HT29	3	278	80.0789
HT29	3	279	80.7737
HT29	3	280	79.384
HCT116	1	1	80.32
HCT116	1	2	79.5
HCT116	1	3	79.23
HCT116	1	4	79.55
HCT116	1	5	80.94
HCT116	1	6	81.08
HCT116	1	7	80.52
HCT116	1	8	81.79
HCT116	1	9	76.66
HCT116	1	10	81.9
HCT116	1	11	80.53
HCT116	1	12	79.08
HCT116	1	13	77.92
HCT116	1	14	80.16
HCT116	1	15	80.72
HCT116	1	16	78.7
HCT116	1	17	79.42
HCT116	1	18	80.75
HCT116	1	19	80.53
HCT116	1	20	79.65
HCT116	1	21	80.14
HCT116	1	22	80.31
HCT116	1	23	81.18
HCT116	1	24	81.59
HCT116	1	25	80.52
HCT116	1	26	79.54
HCT116	1	27	80.51
HCT116	1	28	80.86
HCT116	1	29	79.57
HCT116	1	30	79.06
HCT116	1	31	81.1
HCT116	1	32	83.34
HCT116	1	33	83.2
HCT116	1	34	80.08
HCT116	1	35	81.27
HCT116	1	36	79.29
HCT116	1	37	79.02
HCT116	1	38	79.96
HCT116	1	39	79.12
HCT116	1	40	79.15
HCT116	1	41	82.74
HCT116	1	42	81.46
HCT116	1	43	81.39
HCT116	1	44	81.2
HCT116	1	45	80.33
HCT116	1	46	81.73
HCT116	1	47	78.23
HCT116	1	48	77.4
HCT116	1	49	78.69
HCT116	1	50	77.83
HCT116	1	51	73.57
HCT116	1	52	76.3
HCT116	1	53	74.77
HCT116	1	54	81.62
HCT116	1	55	79.77
HCT116	1	56	79.83
HCT116	1	57	80.06
HCT116	1	58	81.05
HCT116	1	59	75.27
HCT116	1	60	76.15
HCT116	1	61	78.19
HCT116	1	62	77.02
HCT116	1	63	76.13
HCT116	1	64	76.87
HCT116	1	65	78.75
HCT116	1	66	81.57
HCT116	1	67	82.32
HCT116	1	68	81.91
HCT116	1	69	84.63
HCT116	1	70	82.89
HCT116	1	71	77.32
HCT116	1	72	78.02
HCT116	1	73	75.81
HCT116	1	74	75.68
HCT116	1	75	78.67
HCT116	1	76	79.99
HCT116	1	77	75.92
HCT116	1	78	78.2
HCT116	1	79	83.09
HCT116	1	80	77.93
HCT116	1	81	75.75
HCT116	1	82	80.3
HCT116	1	83	78.59
HCT116	1	84	79.6
HCT116	1	85	78.08
HCT116	1	86	80.51
HCT116	1	87	82.06
HCT116	1	88	81.46
HCT116	1	89	83.8
HCT116	1	90	83.28
HCT116	1	91	84.77
HCT116	1	92	83.44
HCT116	1	93	80.98
HCT116	1	94	82.17
HCT116	1	95	79.4
HCT116	1	96	82.39
HCT116	1	97	81.47
HCT116	1	98	80.05
HCT116	1	99	79.61
HCT116	1	100	80.24
HCT116	1	101	81.79
HCT116	1	102	81.57
HCT116	1	103	82.06
HCT116	1	104	80.15
HCT116	1	105	79.07
HCT116	1	106	81.79
HCT116	1	107	80.16
HCT116	1	108	81.57
HCT116	1	109	81.19
HCT116	1	110	81.18
HCT116	1	111	79.82
HCT116	1	112	81.55
HCT116	1	113	82.55
HCT116	1	114	78.78
HCT116	1	115	80.01
HCT116	2	116	84.13
HCT116	2	117	82.44
HCT116	2	118	83.19
HCT116	2	119	82.93
HCT116	2	120	81.2
HCT116	2	121	82.6
HCT116	2	122	81.82
HCT116	2	123	79.61
HCT116	2	124	82.2
HCT116	2	125	82.55
HCT116	2	126	80.85
HCT116	2	127	81.43
HCT116	2	128	81.62
HCT116	2	129	84.29
HCT116	2	130	82.97
HCT116	2	131	81.97
HCT116	2	132	82.77
HCT116	2	133	84.54
HCT116	2	134	83.33
HCT116	2	135	82.96
HCT116	2	136	84.1
HCT116	2	137	80.85
HCT116	2	138	79.17
HCT116	2	139	80.56
HCT116	2	140	80.78
HCT116	2	141	80.82
HCT116	2	142	82.43
HCT116	2	143	81.2
HCT116	2	144	82.52
HCT116	2	145	83.25
HCT116	2	146	82.92
HCT116	2	147	83.7
HCT116	2	148	83.36
HCT116	2	149	82.98
HCT116	2	150	82.53
HCT116	2	151	84.94
HCT116	2	152	83.91
HCT116	2	153	83.02
HCT116	2	154	82.81
HCT116	2	155	83.27
HCT116	2	156	82.43
HCT116	2	157	83.21
HCT116	2	158	81.33
HCT116	2	159	81.42
HCT116	2	160	81.35
HCT116	2	161	83.31
HCT116	2	162	83.47
HCT116	2	163	85.34
HCT116	2	164	82.8
HCT116	2	165	82.59
HCT116	2	166	84.47
HCT116	2	167	80.8
HCT116	2	168	80.38
HCT116	2	169	79.47
HCT116	2	170	79.58
HCT116	2	171	80.76
HCT116	2	172	80.22
HCT116	2	173	79.78
HCT116	2	174	81.64
HCT116	2	175	83.94
HCT116	2	176	75.43
HCT116	2	177	78.48
HCT116	2	178	82.3
HCT116	2	179	82.28
HCT116	2	180	81.13
HCT116	2	181	78.1
HCT116	2	182	81.15
HCT116	2	183	78.72
HCT116	2	184	77.82
HCT116	2	185	78.35
HCT116	2	186	80.34
HCT116	2	187	80.81
HCT116	2	188	82.64
HCT116	2	189	82.76
HCT116	2	190	76.79
HCT116	2	191	78.8
HCT116	2	192	81.76
HCT116	2	193	82.85
HCT116	2	194	85.38
HCT116	2	195	84.28
HCT116	2	196	78.22
HCT116	2	197	83.53
HCT116	2	198	77.84
HCT116	2	199	76.86
HCT116	2	200	84.68
HCT116	2	201	78.34
HCT116	2	202	80.62
HCT116	2	203	79.94
HCT116	2	204	78.32
HCT116	2	205	77.87
HCT116	2	206	78.06
HCT116	2	207	78.37
HCT116	2	208	82.53
HCT116	2	209	81.19
HCT116	2	210	79
HCT116	2	211	80.01
HCT116	2	212	80.39
HCT116	2	213	82.34
HCT116	2	214	78.07
HCT116	2	215	77.57
HCT116	2	216	79.78
HCT116	2	217	78.6
HCT116	2	218	78.27
HCT116	2	219	79.48
HCT116	2	220	77.34
HCT116	2	221	79.93
HCT116	2	222	78.78
HCT116	2	223	80.18
HCT116	2	224	79.92
HCT116	2	225	82.04
HCT116	2	226	80.33
HCT116	2	227	81.04
HCT116	2	228	80.95
HCT116	2	229	81.84
HCT116	2	230	81.9
HCT116	2	231	80.29
HCT116	2	232	81.66
HCT116	2	233	80.19
HCT116	2	234	78.48
HCT116	2	235	79.51
HCT116	3	236	81.6
HCT116	3	237	81.92
HCT116	3	238	82.45
HCT116	3	239	82.5
HCT116	3	240	80.78
HCT116	3	241	81.92
HCT116	3	242	82.58
HCT116	3	243	83.1
HCT116	3	244	81.29
HCT116	3	245	83.34
HCT116	3	246	80.32
HCT116	3	247	81.44
HCT116	3	248	83.83
HCT116	3	249	80.44
HCT116	3	250	80.36
HCT116	3	251	80.35
HCT116	3	252	79.56
HCT116	3	253	81.25
HCT116	3	254	82.34
HCT116	3	255	81.29
HCT116	3	256	81.74
HCT116	3	257	82.57
HCT116	3	258	80.79
HCT116	3	259	82.81
HCT116	3	260	80.63
HCT116	3	261	80.34
HCT116	3	262	79.74
HCT116	3	263	80.72
HCT116	3	264	79.49
HCT116	3	265	78.26
HCT116	3	266	80.82
HCT116	3	267	75.88
HCT116	3	268	80.41
HCT116	3	269	78.74
HCT116	3	270	80.14
HCT116	3	271	80.35
HCT116	3	272	81.93
HCT116	3	273	78.08
HCT116	3	274	80.64
HCT116	3	275	80.21
HCT116	3	276	80.32
HCT116	3	277	79.48
HCT116	3	278	79.1
HCT116	3	279	80.88
HCT116	3	280	79.28
HCT116	3	281	79.65
HCT116	3	282	80.73
HCT116	3	283	80.61
HCT116	3	284	78.55
HCT116	3	285	79.7
HCT116	3	286	81.71
HCT116	3	287	80.79
HCT116	3	288	80.41
HCT116	3	289	79.96
HCT116	3	290	81.22
HCT116	3	291	81.63
HCT116	3	292	79.27
HCT116	3	293	82.8
HCT116	3	294	83.1
HCT116	3	295	83.13
HCT116	3	296	82.28
HCT116	3	297	83.6
HCT116	3	298	83.11
HCT116	3	299	81.07
HCT116	3	300	80.76
HCT116	3	301	83.38
HCT116	3	302	81.54
HCT116	3	303	82.81
HCT116	3	304	80.39
HCT116	3	305	82.08
HCT116	3	306	81.69
HCT116	3	307	81.5
HCT116	3	308	79.1
HCT116	3	309	79.33
HCT116	3	310	81.11
HCT116	3	311	81.26
HCT116	3	312	82.65
HCT116	3	313	79.27
HCT116	3	314	80.67
HCT116	3	315	78.61
HCT116	3	316	78.21
HCT116	3	317	77.9
HCT116	3	318	77.58
HCT116	3	319	80.83
HCT116	3	320	79.88
HCT116	3	321	80.19
HCT116	3	322	79.18
HCT116	3	323	79.98
HCT116	3	324	79.05
HCT116	3	325	78.93
HCT116	3	326	80.71
HCT116	3	327	80.24
HCT116	3	328	79.82
HCT116	3	329	79.71
HCT116	3	330	80.23
HCT116	3	331	79.98
HCT116	3	332	79.25
HCT116	3	333	79.71
HCT116	3	334	79.1
HCT116	3	335	78.47
HCT116	3	336	78.88
HCT116	3	337	79.54
HCT116	3	338	80.11
HCT116	3	339	77.61
HCT116	3	340	79.19
CaCo2	1	1	76.23
CaCo2	1	2	78.29
CaCo2	1	3	75.72
CaCo2	1	4	76.95
CaCo2	1	5	75.36
CaCo2	1	6	77.92
CaCo2	1	7	75.8
CaCo2	1	8	82.71
CaCo2	1	9	79.17
CaCo2	1	10	79.1
CaCo2	1	11	74.57
CaCo2	1	12	78.73
CaCo2	1	13	79.47
CaCo2	1	14	79.57
CaCo2	1	15	78.58
CaCo2	1	16	77.59
CaCo2	1	17	78.61
CaCo2	1	18	79.49
CaCo2	1	19	78.62
CaCo2	1	20	79.8
CaCo2	1	21	76.36
CaCo2	1	22	77.34
CaCo2	1	23	76.9
CaCo2	1	24	75.8
CaCo2	1	25	76.71
CaCo2	1	26	71.85
CaCo2	1	27	76.8
CaCo2	1	28	74.43
CaCo2	1	29	79.38
CaCo2	1	30	75.01
CaCo2	1	31	71.13
CaCo2	1	32	73.52
CaCo2	1	33	77
CaCo2	1	34	71.94
CaCo2	1	35	78.97
CaCo2	1	36	75.09
CaCo2	1	37	79.46
CaCo2	1	38	81.25
CaCo2	1	39	71.48
CaCo2	1	40	77.18
CaCo2	2	41	77.79
CaCo2	2	42	80.68
CaCo2	2	43	78.56
CaCo2	2	44	80.6
CaCo2	2	45	82.07
CaCo2	2	46	79.59
CaCo2	2	47	80.12
CaCo2	2	48	81.79
CaCo2	2	49	77.94
CaCo2	2	50	79.06
CaCo2	2	51	79.93
CaCo2	2	52	78.48
CaCo2	2	53	79.96
CaCo2	2	54	79.29
CaCo2	2	55	77.94
CaCo2	2	56	77.3
CaCo2	2	57	78.4
CaCo2	2	58	78.06
CaCo2	2	59	80.22
CaCo2	2	60	77.7
CaCo2	2	61	77.56
CaCo2	2	62	79.2
CaCo2	2	63	78.66
CaCo2	2	64	78.43
CaCo2	2	65	77.81
CaCo2	2	66	78.15
CaCo2	2	67	70.3
CaCo2	2	68	77.89
CaCo2	2	69	79.8
CaCo2	2	70	80.45
CaCo2	2	71	80.34
CaCo2	2	72	78.02
CaCo2	2	73	74.65
CaCo2	2	74	80.91
CaCo2	2	75	80.88
CaCo2	2	76	81.32
CaCo2	2	77	81.03
CaCo2	2	78	80.22
CaCo2	2	79	79.86
CaCo2	2	80	78.23
CaCo2	3	81	72.62
CaCo2	3	82	77.62
CaCo2	3	83	77.2
CaCo2	3	84	75.73
CaCo2	3	85	75.13
CaCo2	3	86	76.02
CaCo2	3	87	74.67
CaCo2	3	88	78.77
CaCo2	3	89	74.82
CaCo2	3	90	78.15
CaCo2	3	91	75.58
CaCo2	3	92	77.41
CaCo2	3	93	77.17
CaCo2	3	94	78.12
CaCo2	3	95	74.64
CaCo2	3	96	72.61
CaCo2	3	97	75.69
CaCo2	3	98	75.15
CaCo2	3	99	76.25
CaCo2	3	100	75.15
CaCo2	3	101	75.59
CaCo2	3	102	77.21
CaCo2	3	103	75.57
CaCo2	3	104	74.14
CaCo2	3	105	72.35
CaCo2	3	106	73.64
CaCo2	3	107	75.57
CaCo2	3	108	73.28
CaCo2	3	109	75.79
CaCo2	3	110	74.79
CaCo2	3	111	74.5
CaCo2	3	112	74.71
CaCo2	3	113	74.53
CaCo2	3	114	72.75
CaCo2	3	115	77.57
CaCo2	3	116	73.61
CaCo2	3	117	75.77
CaCo2	3	118	74.44
CaCo2	3	119	74.72
CaCo2	3	120	76.7
CaCo2	4	121	77.98
CaCo2	4	122	75.87
CaCo2	4	123	74.48
CaCo2	4	124	76.83
CaCo2	4	125	77.96
CaCo2	4	126	75.63
CaCo2	4	127	79.14
CaCo2	4	128	79.34
CaCo2	4	129	78.72
CaCo2	4	130	76.03
CaCo2	4	131	81.13
CaCo2	4	132	78.13
CaCo2	4	133	83.41
CaCo2	4	134	78.09
CaCo2	4	135	78.11
CaCo2	4	136	66.25
CaCo2	4	137	71.44
CaCo2	4	138	69.74
CaCo2	4	139	73.4
CaCo2	4	140	67.89
CaCo2	4	141	73.93
CaCo2	4	142	71.54
CaCo2	4	143	75.86
CaCo2	4	144	74.05
CaCo2	4	145	73.51
CaCo2	4	146	73.33
CaCo2	4	147	74.91
CaCo2	4	148	75.85
CaCo2	4	149	72.54
CaCo2	4	150	70.45
CaCo2	4	151	73.54
CaCo2	4	152	72.32
CaCo2	4	153	73.36
CaCo2	4	154	76.93
CaCo2	4	155	69.57
CaCo2	4	156	73.59
CaCo2	4	157	73.37
CaCo2	4	158	76.69
CaCo2	4	159	70.39
CaCo2	4	160	69.94
CT26	1	1	79.51
CT26	1	2	79.4
CT26	1	3	81.5
CT26	1	4	81.27
CT26	1	5	80.7
CT26	1	6	79.06
CT26	1	7	79.71
CT26	1	8	81.66
CT26	1	9	82.65
CT26	1	10	79.21
CT26	1	11	77.22
CT26	1	12	81.46
CT26	1	13	79.82
CT26	1	14	82.08
CT26	1	15	77.81
CT26	1	16	79.23
CT26	1	17	80.97
CT26	1	18	83.4
CT26	1	19	83.79
CT26	1	20	84.78
CT26	1	21	83.54
CT26	1	22	84.17
CT26	1	23	84.15
CT26	1	24	82.43
CT26	2	25	84.79
CT26	2	26	85.3
CT26	2	27	85.9
CT26	2	28	84.47
CT26	2	29	86.17
CT26	2	30	86.86
CT26	2	31	86.33
CT26	2	32	86.44
CT26	2	33	86.82
CT26	2	34	84.56
CT26	2	35	84.88
CT26	2	36	85.92
CT26	2	37	84.95
CT26	2	38	84.36
CT26	2	39	82.42
CT26	2	40	85.48
CT26	2	41	84.96
CT26	2	42	83.33
CT26	2	43	83.92
CT26	2	44	81.59
CT26	2	45	83.77
CT26	2	46	83.95
CT26	2	47	86.71
CT26	2	48	84.79
CT26	2	49	85.46
CT26	2	50	83.93
CT26	2	51	84.95
CT26	2	52	87.04
CT26	2	53	86.37
CT26	2	54	84.3
CT26	2	55	85.75
CT26	2	56	86.84
CT26	2	57	87.96
CT26	2	58	85.82
CT26	2	59	85.57
CT26	2	60	85.24
CT26	2	61	83.9
CT26	2	62	83
CT26	2	63	84.62
CT26	2	64	86.76
CT26	2	65	84.78
CT26	2	66	85.42
CT26	2	67	84.68
CT26	2	68	86.29
CT26	2	69	85.28
CT26	2	70	87.07
CT26	2	71	83.35
CT26	3	72	83.13
CT26	3	73	82.86
CT26	3	74	82.31
CT26	3	75	84.53
CT26	3	76	82.02
CT26	3	77	84.42
CT26	3	78	82.73
CT26	3	79	78.85
CT26	3	80	76.34
CT26	3	81	78.35
CT26	3	82	73.87
CT26	3	83	83.48
CT26	3	84	78.54
CT26	3	85	85.19
CT26	3	86	77.04
CT26	3	87	75.96
CT26	3	88	76.51
CT26	3	89	81.41
CT26	3	90	75.54
CT26	3	91	77.38
CT26	3	92	80.55
CT26	3	93	74.85
CT26	3	94	79.88
CT26	3	95	79.39
CT26	3	96	83.09
CT26	3	97	85.56
CT26	3	98	82.76
CT26	3	99	82.96
CT26	3	100	82.78
CT26	3	101	82.27
CT26	3	102	81.03
CT26	3	103	85.54
CT26	3	104	82.93
CT26	3	105	87.42
CT26	3	106	83.79
CT26	3	107	87.36
CT26	3	108	86.38
CT26	3	109	84.74
CT26	3	110	87.37
CT26	3	111	85.01
CT26	3	112	81.87
CT26	3	113	88.21
CT26	3	114	80.6
CT26	3	115	84.59
CT26	3	116	80.96
CT26	3	117	84.57
CT26	3	118	83.04
CT26	3	119	85.05
CT26	3	120	83.95
CT26	3	121	84.67
CT26	3	122	82.05
CT26	3	123	83.2
CT26	3	124	83.39
CT26	3	125	85.43
CT26	3	126	85.21
CT26	3	127	78.71
CT26	3	128	79.41
CT26	4	129	81.77
CT26	4	130	82.45
CT26	4	131	83.6
CT26	4	132	85.18
CT26	4	133	82.37
CT26	4	134	85.47
CT26	4	135	82.54
CT26	4	136	83.69
CT26	4	137	85.29
CT26	4	138	82.46
CT26	4	139	83.54
CT26	4	140	84.64
CT26	4	141	82.47
CT26	4	142	78.52
CT26	4	143	82.97
CT26	4	144	76.46
CT26	4	145	79.69
CT26	4	146	81.65
CT26	4	147	74.19
CT26	4	148	81.52
CT26	4	149	78.06
CT26	4	150	77.34
CT26	4	151	80.44
CT26	4	152	81.18
CT26	4	153	80.49
CT26	4	154	81.96
CT26	4	155	84.78
CT26	4	156	85.79
CT26	4	157	81.86
CT26	4	158	79.72
CT26	4	159	83.23
CT26	4	160	85.1
CT26	4	161	79.81
CT26	4	162	82.47
CT26	4	163	79.47
CT26	4	164	83.46
CT26	5	165	84
CT26	5	166	83.71
CT26	5	167	83.65
CT26	5	168	83.03
CT26	5	169	82.46
CT26	5	170	83.98
CT26	5	171	82.36
CT26	5	172	81.1
CT26	5	173	84.29
CT26	5	174	81.79
CT26	5	175	81.32
CT26	5	176	82.94
CT26	5	177	83.26
CT26	5	178	84.01
CT26	5	179	86.61
CT26	5	180	82.62
CT26	5	181	85.63
CT26	5	182	86.68
CT26	5	183	85.07
CT26	5	184	85
CT26	5	185	82.87
CT26	5	186	84.75
CT26	5	187	82.25
CT26	5	188	83.79
CT26	5	189	83.27
CT26	5	190	84.82
CT26	5	191	82.89
CT26	5	192	81.73
CT26	5	193	80.9
CT26	5	194	82.46
CT26	5	195	85.2
CT26	5	196	84.69
CT26	5	197	81.86
CT26	5	198	84.64
CT26	5	199	83.15
CT26	5	200	84.53
CT26	5	201	82.58
CT26	5	202	83.47
CT26	5	203	85.19
CT26	5	204	84.19
CT26	5	205	84.37
CT26	5	206	82.98
CT26	5	207	81.45
CT26	5	208	82.74
CT26	6	209	85.11
CT26	6	210	82.73
CT26	6	211	84.84
CT26	6	212	85.22
CT26	6	213	84.71
CT26	6	214	81.49
CT26	6	215	84.54
CT26	6	216	85.86
CT26	6	217	86.19
CT26	6	218	84.51
CT26	6	219	81.77
CT26	6	220	80.64
CT26	6	221	82.89
CT26	6	222	85.52
CT26	6	223	82.52
CT26	6	224	82.8
CT26	6	225	86
CT26	7	226	83.64
CT26	7	227	82.26
CT26	7	228	81.9
CT26	7	229	80.23
CT26	7	230	80.05
CT26	7	231	84.39
CT26	7	232	82.83
CT26	7	233	81.67
CT26	7	234	79.98
CT26	7	235	82
CT26	7	236	80.18
CT26	7	237	77.51
CT26	7	238	81.57
CT26	7	239	84.73
CT26	7	240	78.98
CT26	7	241	81.33
CT26	8	242	84.4
CT26	8	243	84
CT26	8	244	84.02
CT26	8	245	85.38
CT26	8	246	82.61
CT26	8	247	83.25
CT26	8	248	80.86
CT26	8	249	85.82
CT26	8	250	84.62
CT26	8	251	83.27
CT26	8	252	86.61
CT26	8	253	84.86
CT26	8	254	82.68
CT26	8	255	84.28
CT26	8	256	84.63
CT26	8	257	86.23
CT26	8	258	84.25
CT26	8	259	82.63
CT26	8	260	85.14
CT26	8	261	84.21
CT26	8	262	86.23
CT26	8	263	87.26
CT26	8	264	86.62
CT26	8	265	84.5
CT26	8	266	83.33
CT26	8	267	86.61
CT26	8	268	86.29
CT26	8	269	84.66
CT26	8	270	80.44
CT26	8	271	80.18
CT26	8	272	84.38
CT26	8	273	82.14
CT26	8	274	86.24
CT26	8	275	86.6
CT26	8	276	86.03
CT26	8	277	83.87
CT26	8	278	83.5
CT26	8	279	84.63
CT26	8	280	82.46
CT26	8	281	82.09
CT26	8	282	86.56
CT26	8	283	81.43
CT26	8	284	82.87
CT26	8	285	81.67
CT26	8	286	84.78
CT26	8	287	85.38
CT26	8	288	84.13
CT26	8	289	83.77
CT26	8	290	83.67
CT26	8	291	85.97
CT26	8	292	85.58
CT26	9	293	80.71
CT26	9	294	76.96
CT26	9	295	82.92
CT26	9	296	78.89
CT26	9	297	79.1
CT26	9	298	81.98
CT26	9	299	79.91
CT26	9	300	80.51
CT26	9	301	80.8
CT26	9	302	78.37
CT26	9	303	80.24
CT26	9	304	80.96
CT26	9	305	83.98
CT26	9	306	82.09
CT26	9	307	84.5
CT26	9	308	81.36
CT26	9	309	82.45
CT26	9	310	82.49
CT26	9	311	82.93
CT26	9	312	82.73
CT26	9	313	82.82
CT26	9	314	84.03
CT26	9	315	83.11
CT26	9	316	81.26
CT26	9	317	78.95
CT26	9	318	78.75
CT26	9	319	76.85
CT26	9	320	79.34
CT26	9	321	80.14
CT26	9	322	80.81
CT26	9	323	76.71
CT26	9	324	76.67
CT26	9	325	72.32
CT26	9	326	75.99
CT26	9	327	76.27
CT26	9	328	78.48
CT26	9	329	77.82
CT26	9	330	79.21
CT26	9	331	81.12
CT26	9	332	77.24
CT26	9	333	80.19
CT26	9	334	77.91
CT26	9	335	77.76
CT26	9	336	80.65
CT26	9	337	78.49
CT26	9	338	80.11
CT26	9	339	78.2
CT26	9	340	77.61
CT26	9	341	78.42
CT26	9	342	79.24
CT26	9	343	80.91
CT26	9	344	81.66
CT26	9	345	81.31
CT26	9	346	76.14
CT26	9	347	80.2
CT26	9	348	81.44
CT26	9	349	80.98
CT26	9	350	78.66
