# Supplementary material for: Insights into metabolic heterogeneity of colorectal cancer gained from fluorescence lifetime imaging
Source: eLife. 2024 Aug 28;13:RP94438. doi: 10.7554/eLife.94438 (PMC11357354; doi:10.7554/eLife.94438)
Supplement: Figure 3—source data 1. [file elife-94438-fig3-data1.xlsx]

## Sheet: Лист1
patient	a1, %
1	68.6867
1	70.8188
1	65.8129
1	70.0097
1	70.0542
1	75.3415
1	70.0783
1	71.4257
1	73.4118
1	68.691
1	63.7018
1	74.5063
1	77.1411
1	71.0639
1	71.54
1	65.2671
1	62.3547
1	62.7732
1	68.807
1	57.5412
1	69.9607
1	68.2275
1	66.248
1	67.1227
1	66.7374
1	72.5798
1	74.8616
1	56.71
1	69.0566
1	56.6438
1	65.7131
1	59.451
1	64.1957
1	57.0296
1	66.3271
1	62.7885
1	68.1124
1	70.5394
1	69.0447
1	66.0565
1	74.0693
1	70.5441
1	62.1137
1	66.8477
1	67.6232
1	65.4464
1	60.9262
1	67.3404
1	69.8312
1	68.3642
1	75.7494
1	69.3175
1	74.0805
1	64.3836
1	69.6218
1	72.2495
1	64.2397
1	68.8113
1	72.4366
1	73.1515
1	56.4019
1	71.9096
1	68.6417
1	67.2689
1	70.2159
1	71.1054
1	73.3784
1	72.246
1	68.9753
1	69.852
1	73.6235
1	73.8263
1	72.0139
1	72.053
1	64.8832
1	66.1031
1	59.57
1	64.4811
1	68.0672
1	56.0107
1	61.8848
1	53.4194
1	54.9699
1	64.1171
1	61.145
1	55.821
1	63.9087
1	68.5223
1	59.8699
1	67.5415
1	65.2223
1	64.1473
1	64.0159
1	62.626
1	58.1924
1	75.2041
1	70.443
1	70.9442
1	59.2711
1	57.8754
1	65.4971
1	58.3777
1	71.2873
1	66.9676
1	62.9102
1	73.3773
1	55.5042
1	54.6142
1	59.2352
1	61.5216
1	68.1412
1	59.6794
1	58.693
1	63.903
2	76.02
2	72.01
2	78.7
2	77.7
2	80.49
2	77.34
2	80.57
2	77.29
2	74.82
2	80.29
2	78.27
2	77.25
2	76.38
2	77.39
2	79.52
2	80.64
2	78.66
2	78.9
2	80.58
2	81.69
2	82.62
2	75.97
2	83.77
2	81.45
2	78.5
2	82.12
2	82.6
2	80.69
2	74.64
2	70.73
2	77.27
2	75.49
2	73.93
2	71.14
2	75.47
2	70.93
2	74.41
2	71.87
2	76.38
2	79.98
2	78.95
2	76.13
2	76.55
2	75.62
2	77.03
2	80.59
2	78.43
2	76.5
2	74.17
2	77.51
2	79.58
2	74.5
2	76.54
2	73.76
2	71.13
2	79.08
2	73.2
2	74.74
2	75.16
2	76.82
2	77.02
2	76.72
2	74.62
2	75.52
2	78.83
2	76.47
2	72.47
2	75.95
2	74.63
2	78.3
2	74.03
2	80.14
3	61.6839
3	55.0617
3	58.023
3	70.4761
3	64.0048
3	58.3363
3	66.4512
3	64.105
3	60.8993
3	60.5609
3	66.9837
3	73.375
3	60.2894
3	62.2952
3	56.4278
3	57.7047
3	63.2748
3	57.7501
3	55.9831
3	60.4285
3	66.782
3	65.5505
3	60.4068
3	69.763
3	62.623
3	69.9492
3	64.1133
3	57.0522
3	62.6044
3	55.5349
3	63.7129
3	67.8266
3	60.6141
3	65.31
3	67.9065
3	64.8362
3	65.624
3	65.6381
3	56.295
3	55.913
3	56.1929
3	65.4906
3	59.0169
3	61.7739
3	54.4586
3	61.8526
3	54.085
3	62.3795
3	62.0618
3	54.2747
3	53.3753
3	68.8507
3	56.4769
3	56.1401
3	66.0554
3	57.9488
3	64.6651
3	55.7925
3	54.2318
3	57.2071
3	59.066
3	64.8328
3	76.7932
3	54.1911
3	59.6964
3	65.8731
3	61.748
3	54.4338
3	76.5291
3	57.0375
3	72.7625
3	59.5485
3	75.0436
3	76.9586
3	60.422
3	70.8593
3	53.8926
3	72.0089
3	64.3042
3	66.473
3	63.6991
3	64.9907
3	58.6193
3	71.7959
3	63.2035
3	63.4457
3	57.7135
3	64.03
3	53.7255
3	70.1887
3	60.8802
3	66.7225
3	62.7075
3	70.0365
3	53.6033
3	69.2249
3	63.0358
3	66.4222
3	67.4525
3	60.3782
3	56.3328
3	55.6659
3	54.0554
3	57.9762
3	55.0228
3	62.8151
3	56.9072
3	54.3316
3	66.315
3	56.0897
3	69.9285
3	69.408
3	66.1019
3	72.0588
3	60.4265
3	61.3681
3	55.15
3	71.0937
3	53.3601
3	61.5206
3	60.1712
3	64.6326
3	58.5105
3	59.6991
3	65.4363
3	64.0498
4	58.8391
4	58.631
4	64.7481
4	57.0829
4	63.685
4	51.0071
4	68.7905
4	55.4012
4	61.1832
4	68.6148
4	63.5588
4	68.7956
4	62.1888
4	67.7357
4	73.5182
4	67.0054
4	62.3841
4	61.8903
4	57.108
4	77.2604
4	73.6095
4	78.5103
4	77.7023
4	75.5587
4	59.4323
4	72.1977
4	69.4191
4	81.1043
4	73.5446
4	58.5199
4	49.7366
4	74.9371
4	71.6309
4	62.9214
4	79.0154
4	60.1512
4	51.7994
4	67.2303
4	58.6526
4	58.1531
4	63.0872
4	73.7119
4	80.3266
4	58.2038
4	70.1219
4	48.1917
4	62.4503
4	56.0931
4	52.9169
4	67.0229
4	75.3425
4	56.9983
4	56.1867
4	49.5986
4	70.4241
4	57.4957
4	65.0468
4	57.9766
4	72.4709
4	74.0044
4	52.2764
4	61.6918
4	62.4322
4	69.3287
4	63.6925
4	64.7885
4	57.5384
4	60.07
4	72.8019
4	56.0409
4	64.813
4	53.7936
4	59.4624
4	55.3465
4	62.2187
4	63.964
4	63.2505
4	67.8694
4	73.605
4	58.8391
4	58.631
4	64.7481
4	63.685
4	68.7905
4	61.1832
4	68.6148
4	63.5588
4	68.7956
4	62.1888
4	67.7357
4	73.5182
4	67.0054
4	62.3841
4	61.8903
4	77.2604
4	73.6095
4	78.5103
4	77.7023
4	75.5587
4	72.1977
4	69.4191
4	81.1043
4	73.5446
4	74.9371
4	71.6309
4	62.9214
4	79.0154
4	60.1512
4	67.2303
4	63.0872
4	73.7119
4	80.3266
4	70.1219
4	62.4503
4	67.0229
4	75.3425
4	70.4241
4	65.0468
4	72.4709
4	74.0044
4	61.6918
4	62.4322
4	69.3287
4	63.6925
4	64.7885
4	60.07
4	72.8019
4	64.813
4	59.4624
4	62.2187
4	63.964
4	63.2505
4	67.8694
4	73.605
5	66.3619
5	64.2144
5	68.7546
5	72.3844
5	64.0556
5	71.6143
5	73.4107
5	72.4459
5	76.4848
5	74.5741
5	69.0846
5	66.3881
5	69.7084
5	62.6567
5	62.1962
5	77.8938
5	72.9146
5	68.3928
5	71.6161
5	67.543
5	67.8047
5	63.0761
5	74.6001
5	72.1013
5	67.6908
5	68.6013
5	61.3757
5	64.558
5	72.9247
5	66.8781
5	70.5566
5	68.8406
5	73.4181
5	69.9641
5	66.9789
5	66.6536
5	71.8739
5	63.5868
5	68.9092
5	69.6577
5	61.5415
5	66.7615
5	70.6982
5	60.7881
5	76.8015
5	76.408
5	76.7861
5	77.7917
5	60.6177
5	72.2685
5	72.9804
5	70.5533
5	66.4057
5	75.6415
5	60.185
5	61.9035
5	77.6853
5	73.271
5	74.5
5	61.7467
5	71.4222
5	69.0536
5	62.0268
5	71.9121
5	77.5406
5	71.9353
5	71.0841
5	72.3743
5	71.1963
5	76.911
5	73.4668
5	65.2647
5	70.1558
5	69.5273
5	70.1892
5	61.0425
5	58.6064
5	58.5298
5	58.6831
5	67.8693
5	67.9177
5	70.312
5	58.9322
5	68.2503
5	68.9286
5	66.0064
5	71.6824
5	72.5158
5	66.9646
5	70.6415
5	74.2088
5	61.3545
5	64.4623
5	69.4428
5	74.1712
5	60.0469
5	62.3643
5	65.7903
5	75.6024
5	59.876
5	61.9295
5	58.0693
5	61.0635
5	61.5813
5	58.393
5	66.8945
5	72.3286
5	69.0245
5	59.9198
5	69.8464
5	56.9811
5	63.3929
5	56.4241
5	64.5181
5	64.8333
5	63.586
5	70.4431
5	68.896
5	67.4977
5	64.9239
5	59.3792
5	66.2235
5	68.2473
5	62.9531
5	58.0902
5	69.7229
5	67.8971
5	68.6106
5	69.4928
5	69.2398
5	61.9416
5	59.3502
5	60.1574
5	65.8258
5	58.1832
5	68.0432
5	67.927
5	66.6578
5	69.7566
5	70.5298
5	67.1952
5	68.8868
5	62.8486
5	71.9737
5	76.2694
5	74.1816
5	68.6951
5	55.7465
5	62.6118
5	66.0457
5	66.8384
5	58.6787
5	65.3064
5	67.1092
5	57.0343
5	75.6566
5	68.936
5	67.2987
5	65.4832
5	65.4529
5	61.8291
5	67.0705
5	61.4025
5	65.7124
5	58.3044
5	66.8966
5	67.1026
5	70.0089
5	67.7468
5	60.1468
5	77.8444
5	65.1844
5	62.4975
5	68.0396
5	57.6527
5	59.0694
5	64.3455
5	68.8238
5	58.664
5	60.1027
5	57.7437
5	66.5556
5	70.9928
5	65.9729
5	74.8839
5	61.3976
5	69.7369
5	66.5932
5	66.3631
5	71.8011
5	69.1629
5	68.6913
5	70.7134
5	61.8207
5	67.8992
5	68.1519
5	57.5573
5	70.0776
5	66.567
5	72.7762
5	60.2445
5	75.1862
5	70.2114
5	64.0952
5	61.7419
5	68.8061
5	62.6639
5	67.2525
5	73.6299
5	63.7787
5	68.2696
5	62.9304
5	62.2887
5	60.4413
5	67.6428
5	59.404
5	70.0916
5	68.7343
5	68.1213
5	75.2149
5	67.228
5	70.6136
5	70.295
5	65.8037
5	73.0483
5	67.0315
5	67.7396
5	68.3031
5	71.049
5	68.4816
5	66.0875
5	69.3009
5	67.3411
5	63.426
5	63.3684
5	68.4578
5	69.4059
5	63.5809
5	73.06
5	66.4982
5	62.0062
5	69.5498
5	71.7767
5	68.524
5	69.1067
5	66.0756
5	67.5473
5	69.7965
5	68.0856
5	68.7327
5	67.3257
5	69.8473
5	70.5715
5	74.5678
5	65.3097
5	64.0902
5	69.5271
5	60.2158
5	66.1156
5	71.682
5	73.0476
5	63.1271
5	67.5209
5	62.313
5	64.1406
5	72.947
5	73.0461
5	75.7466
5	72.9846
5	75.7743
5	72.7658
5	72.0492
5	63.9648
5	65.5355
5	64.8809
5	74.1259
5	68.3368
5	70.6496
5	67.4677
5	69.6168
5	74.3821
5	68.2704
5	64.7266
5	72.766
5	71.6152
5	75.8991
5	62.8949
5	64.882
5	62.6834
5	76.0239
5	63.8221
5	60.0419
6	60.1175
6	56.7942
6	71.808
6	73.8313
6	60.5281
6	61.1273
6	58.7438
6	64.2004
6	58.6056
6	62.8869
6	72.7487
6	65.9547
6	67.3342
6	65.5003
6	56.135
6	64.6823
6	58.8848
6	61.9076
6	64.8075
6	69.3782
6	65.9209
6	64.9916
6	55.9648
6	61.9664
6	66.9343
6	69.9539
6	62.7277
6	66.9763
6	59.6186
6	59.9996
6	68.4088
6	56.6202
6	62.1599
6	57.1382
6	60.0344
6	60.819
6	58.0642
6	56.2095
6	59.6733
6	67.2502
6	55.857
6	68.5283
6	55.3006
6	67.1018
6	54.5904
6	63.9153
6	67.1781
6	60.9129
6	56.0549
6	55.6655
6	58.5358
6	65.6919
6	55.9625
6	67.1352
6	64.5861
6	65.7156
6	69.1941
6	67.3999
6	62.2585
6	68.85
6	69.0911
6	65.6025
6	69.0454
6	70.0769
6	61.4681
6	61.1317
6	57.3954
6	54.9816
6	58.746
6	67.9415
6	58.8318
6	56.9695
6	63.7595
6	68.2619
6	64.8763
6	60.6962
6	58.5978
6	65.3801
6	63.7627
6	57.3384
6	65.2391
6	62.697
6	72.2151
6	67.4037
6	62.1159
6	65.0928
6	58.8444
6	68.9581
6	64.5956
6	61.8938
6	66.1475
6	63.6013
6	56.0753
6	61.0198
6	60.9055
6	65.3631
6	67.0799
6	60.7366
6	64.6715
6	62.5307
6	60.9816
6	65.2754
6	66.3971
6	61.9662
6	61.1975
6	61.4501
6	65.6951
6	63.077
6	55.3602
6	66.273
6	58.4261
6	60.8072
6	62.3401
6	62.5752
6	68.3724
6	64.8619
6	73.2703
6	72.4879
6	68.1543
6	64.953
6	66.3866
6	66.3325
6	60.5031
6	63.3652
6	57.2373
6	62.7063
6	57.3695
6	64.9557
6	55.7986
6	63.1339
6	64.1237
6	63.7404
6	65.7199
6	59.1023
6	66.9956
6	64.923
6	57.3904
6	69.448
6	61.5011
6	68.7271
6	53.25
6	62.0449
6	67.9696
6	57.5942
6	60.7684
6	65.2643
6	65.962
6	74.3521
6	69.1739
6	73.0541
6	74.6393
6	63.6574
6	67.4282
6	72.5795
6	68.0226
6	61.1576
6	64.8458
6	74.6262
6	65.5201
6	73.2132
6	68.708
6	71.4917
6	69.9229
6	61.3746
6	75.4146
6	68.7317
6	60.642
6	66.227
6	62.8979
6	62.0195
6	66.4079
6	62.152
6	61.6513
6	66.7555
6	70.9817
6	60.396
6	69.2175
6	62.3339
6	66.696
6	58.8516
6	59.1544
6	65.5952
6	69.8657
6	63.6303
6	66.5073
6	71.1392
6	65.6567
6	63.4988
6	74.6106
6	67.0431
6	75.4028
6	72.6604
6	64.6816
6	72.3179
6	70.829
6	68.9735
6	59.8775
6	73.4007
6	67.8013
6	71.6455
6	62.3209
6	74.9394
6	73.9492
6	74.9124
6	73.1949
6	67.0307
6	66.8821
6	59.5829
6	75.4166
6	76.9995
6	78.265
6	77.3206
6	76.8683
6	75.2996
6	74.2074
6	73.4544
6	69.9764
6	62.3485
6	71.1343
6	77.2003
6	62.6927
6	70.7817
6	66.7141
6	75.7585
6	72.1213
6	68.4354
6	73.1139
6	76.4778
6	64.8608
6	71.0167
6	69.461
6	61.8002
6	61.9606
6	58.1156
6	73.6031
6	70.6998
6	61.6223
7	60.1108
7	54.7693
7	76.3562
7	59.5148
7	57.1069
7	64.2141
7	55.4962
7	55.1572
7	61.1491
7	69.2231
7	56.7689
7	57.47
7	54.2526
7	56.1752
7	74.0649
7	78.1228
7	58.2675
7	69.6141
7	57.6316
7	74.2614
7	55.0269
7	58.66
7	58.0983
7	57.462
7	58.835
7	54.7195
7	72.7794
7	59.5107
7	68.9996
7	59.9178
7	55.1057
7	58.6661
7	72.9415
7	53.4259
7	56.5443
7	60.6736
7	57.793
7	61.9241
7	58.7672
7	69.7354
7	60.0405
7	57.6788
7	65.0678
7	62.9535
7	62.0633
7	63.9718
7	74.0716
7	60.7392
7	61.567
7	55.8062
7	63.0337
7	62.8408
7	62.427
7	55.5913
7	55.635
7	54.473
7	81.5467
7	52.8733
7	65.8057
7	61.0585
7	73.9951
7	65.0461
7	67.7534
7	67.939
7	76.999
7	66.4837
7	69.0304
7	68.9438
7	80.3813
7	65.9763
7	69.1189
7	68.6208
7	70.0582
7	67.6578
7	56.8405
7	67.0039
7	64.4095
7	63.4223
7	68.8806
7	66.719
7	66.3553
7	60.8237
7	59.8904
7	67.9548
7	62.3337
7	65.4465
7	59.4901
7	70.9321
7	58.2695
7	78.6324
7	68.1854
7	66.584
7	65.7359
7	61.2136
7	70.2275
7	57.1557
7	62.5207
7	65.0986
7	58.4659
7	66.6034
7	66.3665
7	59.6643
7	58.5603
7	62.1885
7	56.2569
7	53.5444
7	63.7739
7	64.6622
7	62.01
7	65.2183
7	66.6287
7	62.2807
7	63.313
7	69.4548
7	67.6915
7	55.5292
7	60.5029
7	64.9646
7	68.1497
7	66.0669
7	73.2086
7	68.0353
7	61.5631
7	60.9492
7	63.9069
7	66.8374
7	63.8637
7	70.398
7	53.9894
7	61.5724
7	55.3063
7	61.3885
7	58.3316
7	67.9667
7	69.8251
8	74.0216
8	84.723
8	82.9604
8	82.4113
8	81.0227
8	84.838
8	79.7226
8	88.6602
8	80.7033
8	81.692
8	77.6052
8	87.8771
8	81.3101
8	86.8586
8	84.5989
8	80.1175
8	80.607
8	75.8615
8	76.1822
8	68.4207
8	70.4874
8	73.7401
8	77.2225
8	75.2237
8	76.2153
8	70.8588
8	76.1534
8	73.3704
8	74.2213
8	71.0897
8	73.9775
8	77.3782
8	76.944
8	77.1646
8	74.2672
8	76.0127
8	76.9654
8	71.7497
8	77.131
8	74.7813
8	77.3558
8	76.3215
8	77.8142
8	77.441
8	78.0467
8	75.8665
8	77.2784
8	79.403
8	79.7395
8	78.8607
8	72.3092
8	75.8446
8	71.9678
8	77.4383
8	75.2264
8	65.6221
8	74.1962
8	72.7079
8	73.5823
8	75.2497
8	64.1565
8	70.9886
8	63.8176
8	74.4126
8	70.7608
8	72.6144
8	72.7833
8	74.6634
8	70.9307
8	70.9463
8	70.721
8	74.2812
8	74.8978
8	77.3638
8	65.9954
8	70.2652
8	70.3844
8	77.8028
8	71.9251
8	71.7756
8	70.4839
8	72.7783
8	71.0468
8	74.5184
8	64.5547
8	69.3477
8	68.7542
8	74.6298
8	72.0182
8	71.2954
8	73.6214
8	70.7027
8	74.3512
8	72.3386
8	66.5778
8	79.2361
8	77.0629
8	74.7147
8	72.1233
8	75.0455
8	68.9946
8	71.0226
8	77.1162
8	70.2817
8	72.6206
8	67.4153
8	67.0578
8	65.9581
8	71.5129
8	73.6225
8	76.39
8	68.1809
8	74.262
8	76.807
8	73.6712
8	67.5678
8	75.7602
8	73.0718
8	66.5101
8	70.8276
8	71.4651
8	72.4063
8	64.0898
8	72.8401
8	72.5447
8	68.6003
8	73.3001
8	73.0157
8	74.2837
8	75.0987
8	70.3488
8	71.5726
8	71.9526
8	73.2022
8	76.5915
8	73.4441
8	72.7048
8	73.1318
8	72.7727
8	66.3965
8	70.4202
8	69.6583
8	73.1936
8	62.856
8	67.8437
8	72.6441
8	69.1551
8	69.0858
8	72.4927
8	71.5677
8	67.8892
8	66.8062
8	73.7588
8	72.0281
8	65.1567
8	72.4154
8	66.6041
8	73.6755
8	71.1149
8	72.0795
8	72.4169
8	67.0133
8	73.4761
8	70.1434
8	69.2159
8	73.0112
8	70.7228
8	69.3913
8	70.2321
8	74.8628
8	75.0233
8	75.8823
8	74.3231
8	73.6377
8	76.0738
8	73.1939
8	72.2156
8	75.023
8	68.7493
8	76.9237
8	76.631
8	71.9185
8	75.1529
8	73.6227
8	77.6624
8	71.1416
8	74.472
8	74.4132
8	72.8589
8	69.0008
8	74.285
8	66.7149
8	68.3791
8	76.7104
8	75.3272
8	76.7117
8	71.0452
8	68.658
8	70.8535
8	71.8759
8	73.5081
8	69.8238
8	63.3009
8	69.6851
8	73.15
8	67.3579
8	74.4417
8	76.9936
8	77.779
8	71.5751
8	70.1976
8	71.6324
8	67.9096
8	71.0942
8	69.3252
8	66.7033
8	73.8125
8	70.0401
8	68.2861
8	72.9056
8	75.6116
8	70.7596
8	72.1604
8	72.9476
8	69.1679
8	68.0477
8	72.6054
8	69.5526
8	70.178
8	74.4456
8	72.4413
8	72.9265
8	71.9593
8	69.0295
8	67.7649
8	84.9026
8	87.8302
8	86.8812
8	87.4758
8	72.8525
8	63.1981
8	87.1854
8	85.8397
8	79.1592
8	63.5681
8	65.446
8	72.4535
8	85.4418
8	71.9566
8	86.1237
8	65.6367
8	60.5988
8	76.5914
8	65.3355
8	67.1038
8	67.5015
8	65.4737
8	69.4767
8	65.2727
8	64.0156
8	63.4667
8	68.4847
8	64.485
8	67.1138
8	65.039
8	68.417
8	65.8321
8	67.7135
8	65.9206
8	68.6934
8	62.0544
8	67.4598
8	61.1888
8	64.2968
8	66.3935
8	65.9644
8	57.4298
8	65.1078
8	66.4104
8	65.9644
8	67.7203
8	67.0517
8	66.1621
8	57.6795
8	67.7568
8	65.8678
8	66.0832
8	69.2428
8	67.5606
8	70.5632
8	67.9381
8	73.2871
8	70.457
8	66.2549
8	70.847
8	72.0956
8	70.1941
8	66.8661
8	65.1679
8	67.8264
8	70.075
8	73.033
8	64.9704
8	66.3834
8	61.1532
8	62.333
8	63.7549
8	70.4651
8	62.6523
8	57.9773
8	63.2651
8	69.1417
8	71.821
8	71.0208
8	72.6001
8	65.0674
8	64.7032
8	67.8155
8	57.8901
8	66.088
8	62.5231
8	58.7555
8	64.9549
8	70.9289
8	58.502
8	67.0198
8	60.9043
8	69.8056
8	74.9394
8	59.4172
8	59.3417
8	66.634
8	59.4073
8	65.4486
8	62.3216
8	63.6161
8	61.4173
8	66.315
8	62.0572
8	55.3006
8	61.3123
8	60.7192
8	61.7605
8	66.8985
8	63.4692
8	71.7437
8	55.9986
8	65.303
8	79.6072
8	63.0237
8	71.6208
8	65.1717
8	61.1296
8	65.0799
8	64.6271
8	68.0765
8	66.4271
8	69.9202
8	66.1748
8	62.075
8	69.9727
8	60.2097
8	55.203
8	67.6966
8	64.5104
8	57.9618
8	62.4141
8	63.508
8	70.3514
8	63.1874
8	60.9088
8	59.0092
8	61.5473
8	66.304
8	67.5565
8	59.5208
8	76.7818
8	58.3385
8	57.9277
8	61.4039
8	56.26
8	62.5193
8	69.7773
8	61.9605
8	69.3833
8	58.9432
8	67.0525
8	65.7174
8	72.8388
8	66.3087
8	57.3489
8	61.4192
8	68.1001
8	54.6302
8	61.4634
8	57.3899
8	59.9969
8	64.2862
8	66.3246
8	74.6642
8	57.812
8	65.259
8	74.4029
8	75.8767
8	73.5811
8	68.771
8	61.3967
8	57.6363
8	57.2241
8	71.9157
8	68.6247
8	79.3765
8	71.5911
8	76.1024
8	67.379
8	64.6344
8	70.5864
8	63.6668
8	74.2238
8	58.2219
8	71.4596
8	71.3574
8	74.431
8	56.4599
8	60.0659
8	58.0839
8	74.1745
8	62.2369
8	63.167
8	56.7264
8	59.281
8	57.4242
8	66.9599
8	72.7245
8	72.6018
8	67.4838
8	70.3304
8	73.755
8	76.2925
8	73.5573
8	71.0294
8	71.9436
8	74.4335
8	71.3514
8	73.0667
8	76.5856
8	68.2319
8	77.3689
8	75.8983
8	70.3611
8	78.4481
8	66.9708
8	68.2972
8	71.1899
8	74.2862
8	73.3374
8	73.7862
8	64.7351
8	74.544
8	69.6118
8	72.6095
8	70.5227
8	68.8773
8	68.5609
8	62.6042
8	75.2227
8	75.3372
8	71.5004
8	74.368
8	76.6885
8	74.2918
8	72.6556
8	75.8124
8	67.179
8	67.9428
8	67.4319
8	68.0344
8	80.6098
8	78.8016
8	69.4119
8	66.8076
8	74.5444
8	75.4108
8	74.8397
8	72.2163
8	73.6736
8	66.0024
8	74.2351
8	75.7099
8	73.0255
8	71.7401
8	76.5097
8	71.4311
8	68.6892
8	73.5529
8	70.3692
8	70.4377
8	76.634
8	73.1433
8	73.0102
8	70.4629
8	71.0959
8	70.8567
8	71.6224
8	72.3411
8	71.6935
8	75.5243
8	74.7473
8	61.3049
8	70.7013
8	74.2999
8	75.7488
8	66.9561
8	71.1666
8	73.3139
8	77.3039
8	80.2945
8	75.4945
8	52.1737
8	70.039
8	78.7644
8	73.5057
8	59.5226
8	69.7409
8	65.2218
8	63.3701
8	62.4619
8	61.9286
8	66.1645
8	52.6565
8	56.896
8	60.8402
8	67.1998
8	58.9286
8	62.2288
8	67.1984
8	71.6498
8	74.1361
8	64.8585
8	70.1058
8	68.9592
8	72.0919
8	60.2814
8	60.2023
8	66.6188
8	67.7404
8	69.0943
8	62.3046
8	74.3544
8	73.7698
8	66.8967
8	73.1751
8	70.4132
8	78.0193
8	78.753
8	71.1727
8	71.9027
8	63.7056
8	66.133
8	61.4229
8	75.8587
8	73.7823
8	66.861
8	63.6292
8	65.0058
8	69.9493
8	74.885
8	66.3002
8	65.1168
8	64.4282
8	76.9231
8	77.9823
8	61.7921
8	70.246
8	68.3649
8	59.1249
8	57.229
8	58.6075
8	68.2821
8	66.6626
8	66.5534
8	65.6282
8	57.495
8	62.1966
8	59.2595
8	62.9599
8	56.9846
8	75.8991
8	59.5426
8	61.6724
8	59.7874
8	70.3379
8	56.8075
8	69.4209
8	62.8252
8	65.8329
8	58.3495
8	65.5841
8	57.4965
8	74.3775
8	62.5549
8	66.9504
8	67.0418
8	55.6987
8	62.8828
8	82.7797
8	68.6771
8	71.8803
8	69.3498
8	68.3268
8	66.5328
8	67.6184
8	58.7403
8	61.0076
8	62.2511
8	70.8164
8	76.3857
8	75.1816
8	70.1521
8	72.9722
8	55.5239
8	76.2553
8	72.8164
8	70.527
8	71.081
8	66.6663
8	74.6055
8	74.7963
8	56.9349
8	61.6291
8	66.9557
8	71.0202
8	85.0336
8	80.636
8	65.7669
8	79.8853
8	67.4264
8	79.5702
8	66.3767
8	69.4044
8	74.7155
8	76.1138
8	77.9927
8	67.2787
8	69.8479
8	70.9749
8	72.0558
8	73.4347
8	73.4697
8	74.2132
8	63.2735
8	78.7004
8	71.2182
8	70.7985
8	62.3999
8	74.5411
8	66.1036
8	76.391
8	74.4551
8	55.7547
8	67.7253
8	71.1938
8	59.9365
8	63.6107
8	67.7694
8	61.5215
8	69.6661
8	78.4716
8	70.4921
8	72.4395
8	66.1908
8	59.8971
8	66.2667
8	68.3115
8	72.0788
8	64.8708
8	57.8901
8	66.9269
8	60.3258
8	73.1852
8	73.9762
8	82.0147
8	71.6722
8	70.2522
8	79.0459
8	60.3519
8	70.3834
8	62.664
8	80.1683
8	77.2632
8	82.4019
8	75.582
8	78.6781
8	83.2673
8	82.9802
8	78.4552
8	79.6223
8	76.446
8	76.9228
8	69.3075
8	80.9174
8	78.7621
8	70.0699
8	73.7138
8	70.7042
8	69.8048
8	75.9623
8	67.7993
8	74.4973
8	76.4619
8	76.1068
8	75.4491
8	77.5724
8	75.0983
8	63.9278
8	76.5373
8	75.7303
8	77.8499
8	78.4801
8	74.5586
8	81.8145
8	83.2681
8	75.416
8	74.2114
8	76.4359
8	76.5803
8	70.3617
8	77.1219
8	80.2485
8	87.2949
8	80.9207
8	73.1153
8	75.8739
8	85.1593
8	73.6189
8	83.2069
8	82.9997
8	78.7572
8	75.3159
8	77.2121
8	72.5893
8	76.4904
8	69.2871
8	81.3761
8	68.7749
8	70.2376
8	77.9776
8	77.8164
8	84.0748
8	67.9405
8	74.4878
8	78.2329
8	74.9022
9	72.1305
9	66.9955
9	59.3363
9	72.3932
9	72.0825
9	83.2882
9	76.4679
9	66.2317
9	60.3928
9	60.56
9	79.9964
9	67.5996
9	64.5628
9	77.1346
9	78.86
9	81.3718
9	67.6269
9	70.4823
9	64.4969
9	61.4344
9	72.6596
9	65.9956
9	57.0999
9	69.5841
9	68.9716
9	71.4651
9	77.2968
9	77.2427
9	58.2313
9	71.4514
9	82.6705
9	70.8303
9	66.5104
9	55.961
9	78.8557
9	76.1829
9	77.7895
9	71.5287
9	70.6737
9	77.9105
9	77.6707
9	78.8904
9	74.0941
9	78.3885
9	82.0257
9	69.859
9	73.6075
9	80.1111
9	75.425
9	82.1717
9	76.1047
9	73.597
9	70.8645
9	59.1291
9	69.4828
9	66.2937
9	79.1115
9	82.2202
9	65.337
9	60.5654
9	75.0597
9	68.362
9	73.8224
9	60.7452
9	75.2754
9	80.1699
9	71.5583
9	71.855
9	76.3385
9	74.2746
9	68.9086
9	63.2692
9	75.7046
9	65.5002
9	74.879
9	77.5832
9	78.9691
9	79.2527
9	76.609
9	63.7717
9	79.6423
9	78.3411
9	80.3121
9	79.8205
9	79.2012
9	70.156
9	79.0784
9	85.6737
9	82.7206
9	71.8205
9	68.3753
9	74.6468
9	59.1784
9	66.2226
9	62.7796
9	50.5393
9	76.0394
9	73.3504
9	70.574
9	68.0075
9	66.1881
9	80.2804
9	79.5062
9	70.1381
9	75.0751
9	81.6307
9	79.0909
9	81.7377
9	56.0757
9	73.7216
9	76.641
9	72.2724
9	67.1729
9	69.1104
9	74.6349
9	68.6955
9	73.2121
9	69.381
9	53.861
9	82.4893
9	69.8573
9	75.2564
9	68.379
9	63.371
9	80.4972
9	70.624
9	71.9448
9	78.5328
9	77.6473
9	60.2771
9	63.4677
9	74.9679
9	54.6763
9	72.9279
9	80.928
9	79.5997
[truncated: 1,714 more rows]
