# Supplementary material for: Insights into metabolic heterogeneity of colorectal cancer gained from fluorescence lifetime imaging
Source: eLife. 2024 Aug 28;13:RP94438. doi: 10.7554/eLife.94438 (PMC11357354; doi:10.7554/eLife.94438)
Supplement: Supplementary file 2. [file elife-94438-supp2.xlsx]

## Sheet: Лист1
№	Tumor site	Tumor type	Tumor stage	Tumor grade	τm, ns	τ1, ns	τ2, ns	a1, %	BI-τm
1	Rectum colon	Adenocarcinoma	cT4bN1M0 (stage IIIB)	High	1.21[1.08;1.31]	0.50[0.44;0.55]	2.68[2.26;3.01]	67.30[62.74;70.61]	1.15
2	Sigmoid colon	Serrated Adenocarcinoma	T4aN0M0 (stage IIB)	Moderate	1.03[0.97;1.08]	0.50[0.47;0.52]	2.89[2.65;3.04]	76.92[74.76;79.05]	1.04
3	Transverse colon	Adenocarcinoma	Т4bN0M0 (stage IIB)	High	1.05[0.98;1.12]	0.46[0.42;0.52]	1.99[1.79;2.31]	61.96[57.17;66.07]	0.29
4	Sigmoid colon	Serrated Adenocarcinoma	Т1N0M0 (stage I)	Low	0.90[0.83;0.97]	0.41[0.38;0.46]	1.83[1.64;2.15]	64.79[60.15;72.47]	0.93
5	Sigmoid colon	Serrated Adenocarcinoma	pT3N0М0 (stage IIA)	Moderate	1.00[0.94;1.08]	0.46[0.43;0.50]	2.14[1.85;2.38]	67.88[63.63;70.69]	0.62
6	Sigmoid colon	Adenoma-like Adenocarcinoma	pT3bN0М0 (stage IIA)	Moderate	1.03[0.96;1.11]	0.50[0.46;0.53]	2.06[1.81;2.29]	64.99[61.13;68.97]	0.88
7	Hepatic flexure	Poorly Cohesive Adenocarcinoma	pТ4aN0M1c (stage IV)	High	1.01[0.92;1.07]	0.45[0.39;0.49]	1.91[1.76;2.14]	62.84[58.47;67.94]	1.05
8	Rectum colon	Adenoma-like Adenocarcinoma	pТ2N0M0 (stage I)	Moderate	0.98[0.90;1.09]	0.44[0.41;0.49]	2.28[1.99;2.58]	70.85[66.26;74.53]	0.29
9	Sigmoid colon	Adenocarcinoma	pR0T3N2bМ0 (stage IIIC)	High	0.86[0.78;0.95]	0.35[0.30;0.39]	2.12[1.76;2.58]	72.20[66.23;77.82]	0.2
10	Rectum colon	Adenoma-like Adenocarcinoma	pТ2N0M0 (stage I)	Low	0.88[0.84;0.98]	0.45[0.42;0.50]	2.31[2.07;2.57]	76.33[72.32;79.41]	1.32
11	Sigmoid colon	Adenocarcinoma	Т3N1M0 (stage IIIB)	Moderate	1.14[1.04;1.23]	0.49[0.46;0.51]	3.00[2.82;3.18]	74.06[71.47;76.07]	1.08
12	Transverse colon	Adenocarcinoma	T3N0М1 (stage IV)	Moderate	1.20[1.13;1.26]	0.50[0.49;0.52]	2.96[2.82;3.13]	71.08[70.29;72.93]	1.4
13	Cecum colon	Adenocarcinoma	Т3N1M0 (stage IIIB)	Moderate	1.19[1.16;1.23]	0.51[0.42;0.53]	2.98[2.80;3.16]	71.50[68.85;74.09]	1.14
14	Rectum colon	Adenocarcinoma	Т3N1M0 (stage IIIB)	Moderate	1.00[9.70;1.04]	0.47[0.46;0.47]	2.86[2.80;2.95]	77.68[76.47;78.72]	0.78
15	Cecum colon	Adenocarcinoma	T3N1М0 (stage IIIB)	Low	1.30[1.23;1.38]	0.53[0.50;0.57]	3.09[2.86;3.37]	69.49[67.19;71.52]	0.78
16	Rectum colon	Adenocarcinoma	Т3N1M0 (stage IIIB)	Moderate	0.87[0.79;0.97]	0.44[0.41;0.47]	2.67[2.51;2.82]	80.24[78.45;81.91]	0.98
17	Hepatic flexure	Adenocarcinoma	T3N0pM1c (stage IV)	Moderate	1.05[0.94;1.19]	0.43[0.36;0.47]	3.10[2.83;3.21]	74.45[72.21;78.50]	1
18	Transverse colon	Adenocarcinoma	T3N0M1c (stage IV)	High	1.23[1.18;1.29]	0.50[0.48;0.52]	3.00[2.87;3.22]	70.76[68.03;73.49]	0.9
19	Sigmoid colon	Adenocarcinoma	cT4bN1M0c (stage IIIB)	Moderate	0.93[0.90;0.97]	0.47[0.44;0.48]	2.75[2.60;2.87]	79.21[77.71;80.05]	1.31
20	Sigmoid colon	Adenocarcinoma	T3N0М0 (stage IIA)	Moderate	0.81[0.74;1.41]	0.23[0.21;0.55]	2.33[2.16;3.23]	70.63[68.41;73.97]	4.24
21	Transverse colon	Adenocarcinoma	сT3N1М0 (stage IIIB)	Low	1.13[1.01;1.20]	0.49[0.48;0.52]	3.22[3.03;3.31]	77.22[73.68;79.47]	0.17
22	Transverse colon	Adenocarcinoma	T4N2M1 (stage IV)	Moderate	1.11[0.94;1.24]	0.47[0.34;0.46]	2.72[2.42; 3.05]	76.37[74.95;78.24]	1.07
23	Transverse colon	Adenocarcinoma	T3N1M0 (stage IIIB)	Moderate	1.17[0.99;1.39]	0.51[0.41;0.56]	2.84[2.23;3.52]	76.08[72.41;78.95]	1.91
24	Rectum colon	Adenocarcinoma	T3N0M0 (stage IIA)	Moderate	1.12[0.99;1.19]	0.37[0.31;0.41]	2.56[2.32;2.86]	77.17[73.77;79.54]	1.34
25	Transverse colon	Adenocarcinoma	pT3N1aM0 (stage IIIB)	High-grade	0.94[0.76;1.08]	0.48[0.42;0.52]	2.64[2.35;2.89]	79.75[77.12;81.99]	1.32
26	Transverse colon	Adenocarcinoma	T4N0M0 (stage IIB)	Moderate	1.29[1.18;1.36]	0.47[0.43;0.52]	3.08[2.88;3.43]	78.92[75.34;81.17]	0.66
27	Hepatic flexure	Adenocarcinoma	pT3N1bM0 (stage IIIB)	Moderate	1.06[1.01;1.12]	0.48[0.42;0.54]	2.44[2.32;2.62]	74.06[72.86;77.01]	0.66
28	Hepatic flexure	Adenocarcinoma	cT3N0M0 (stage IIA)	Moderate	1.31[1.18;1.51]	0.50[0.47;0.53]	3.13[2.78;3.58]	78.25[75.33;81.01]	1.4
29	Transverse colon	Adenocarcinoma	T4N0M0 (stage IIA)	Moderate	1.03[0.92;1.21]	0.48[0.46;0.52]	2.38[2.07;2.85]	76.65[73.44;79.82]	0.86
